# Supplementary material for: Exploring the synergistic effect of alloying toward hydrogen evolution reaction: a case study of Ni3M (M = Ti, Ge and Sn) series
Source: Royal Society of Chemistry journal article supplement (doi:10.1039/d2dt00956k), 2022-01-01
Supplement: d2dt00956k1.pdf [file d2dt00956k1.pdf]

## Supporting information

Exploring the synergistic effect of alloying toward hydrogen evolution reaction: a case study of  $\text{Ni}_3M$  ( $M = \text{Ti}, \text{Ge}$  and  $\text{Sn}$ ) series

*Dong Zhang<sup>a</sup>, Shen-Jing Ji<sup>a</sup>, Yu Cao<sup>\*b</sup> and Nian-Tzu Suen<sup>\*a</sup>*

*a* College of Chemistry & Chemical Engineering, Yangzhou University, Yangzhou 225002, China

*b* College of Environmental Science and Engineering, Chemistry & Chemical Engineering, Yangzhou University, Yangzhou 225000, China

\*Corresponding author: Yu Cao ([yucao@yzu.edu.cn](mailto:yucao@yzu.edu.cn)), Nian-Tzu Suen ([006641@yzu.edu.cn](mailto:006641@yzu.edu.cn))

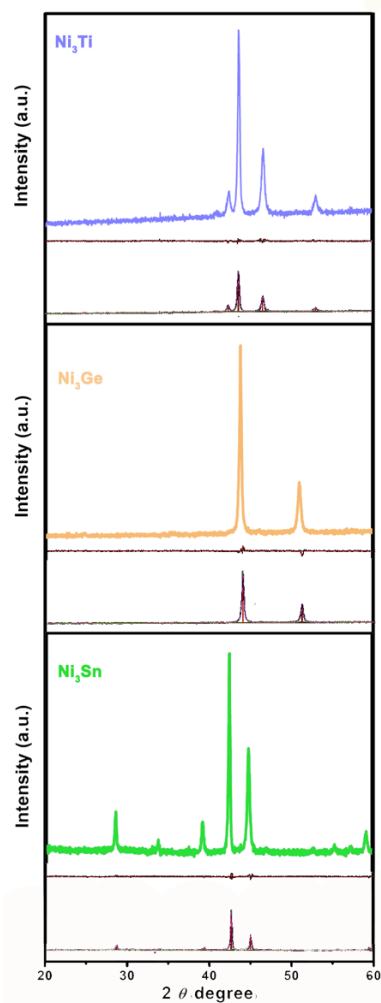

**Figure S1.** Experimental powder XRD patterns of  $\text{Ni}_3M$  ( $M = \text{Ti}, \text{Ge}$  and  $\text{Sn}$ ). The simulated pattern and difference between experimental pattern and simulated one was attached below. The refined lattice constants and interatomic distances were tabulated in Table S1.

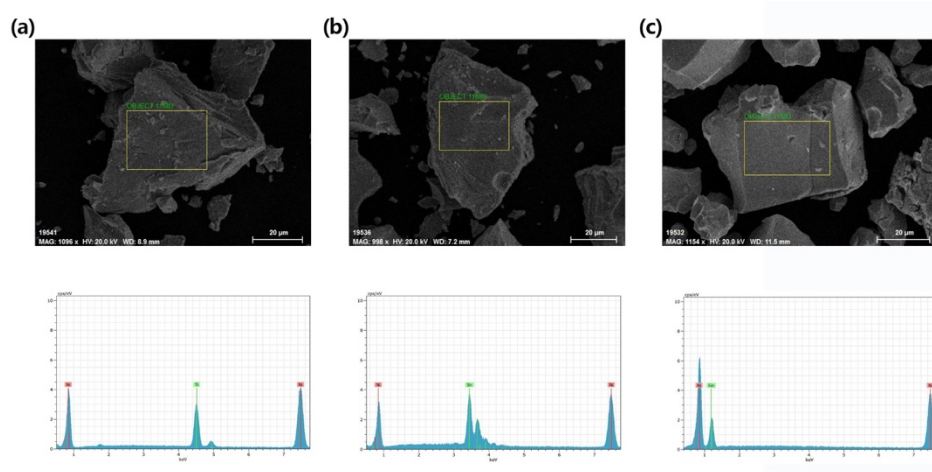

**Figure S2.** SEM image and EDX spectrum of  $\text{Ni}_3M$  ( $M = \text{Ti}, \text{Ge}$  and  $\text{Sn}$ ); (a)  $\text{Ni}_3\text{Ti}$ , (b)  $\text{Ni}_3\text{Ge}$  and (c)  $\text{Ni}_3\text{Sn}$ . The atomic ratio between Ni and  $M$  element of each sample derived from EDX analysis was shown in Table S2.

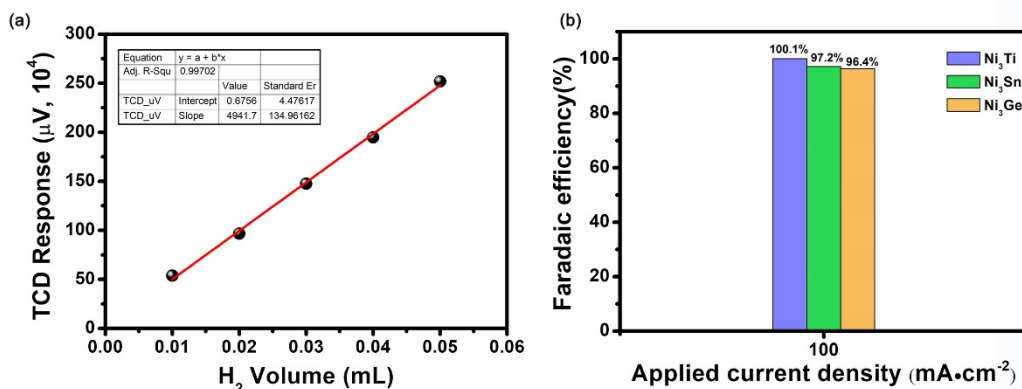

**Figure S3.** (a) H<sub>2</sub> Standard Line (b) applied current density-dependent Faraday efficiency (FE, %) curves of Hydrogen products of electrocatalytic for Ni<sub>3</sub>M ( $M = \text{Ti}, \text{Ge}$  and  $\text{Sn}$ ).

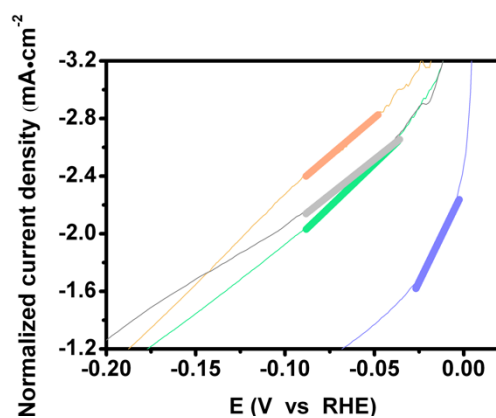

**Figure S4.** Tafel plots derived from normalized LSV based on roughness factor (RF) of Ni<sub>3</sub>M ( $M = \text{Ti}, \text{Ge}$  and  $\text{Sn}$ ) and Ni foam at 1.0 M KOH (scan rate:  $5 \text{ mV s}^{-1}$ ).

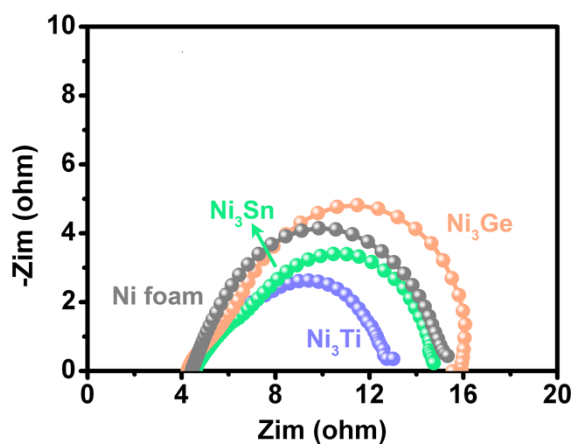

**Figure S5.** Electrochemical impedance spectroscopy (EIS) of Ni<sub>3</sub>M ( $M = \text{Ti}, \text{Ge}$  and  $\text{Sn}$ ) and Ni foam in 1.0 M KOH at -0.192 V (V vs RHE).

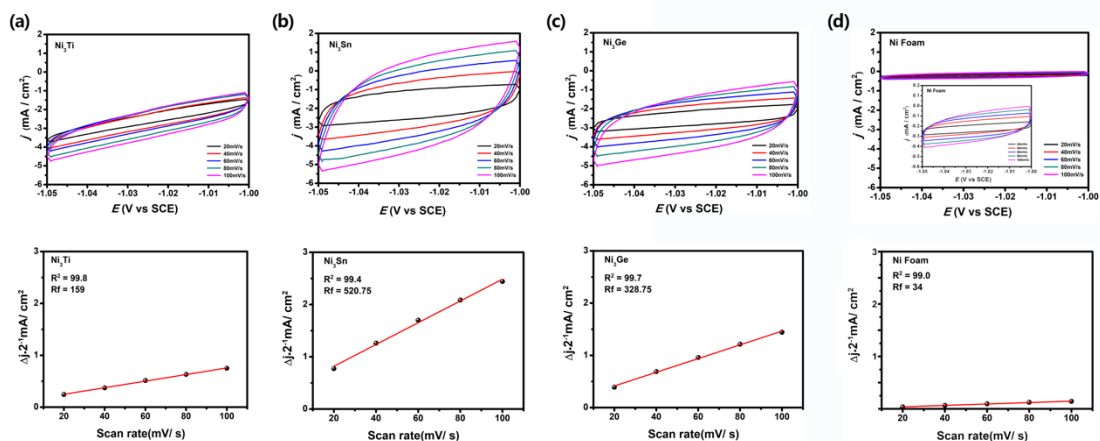

**Figure S6.** Cyclic voltammograms (CV) of  $\text{Ni}_3M$  ( $M = \text{Ti}, \text{Ge}$  and  $\text{Sn}$ ) in 1.0 M KOH; (a)  $\text{Ni}_3\text{Ti}$ , (b)  $\text{Ni}_3\text{Sn}$  (c)  $\text{Ni}_3\text{Ge}$  and (d) Ni Foam. Capacitive current density as a function of scan rate (20 – 100  $\text{mV s}^{-1}$ ). The derived roughness factor (RF) of each compound from the linear regression slope (specific capacitance  $40 \mu\text{F cm}^{-2}$ ) is included at bottom.

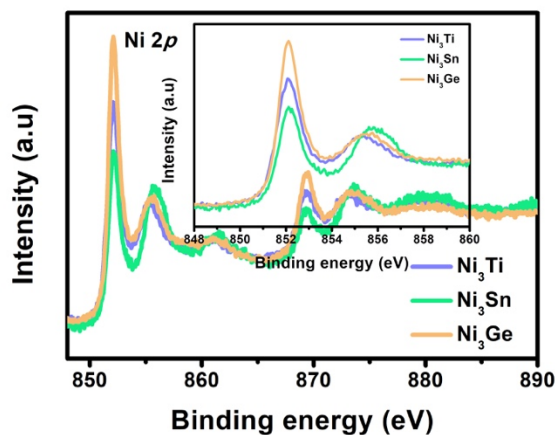

**Figure S7.** X-ray photoelectron spectrum (XPS) in the region of Ni 2p for  $\text{Ni}_3M$  ( $M = \text{Ti}, \text{Ge}$  and  $\text{Sn}$ ).

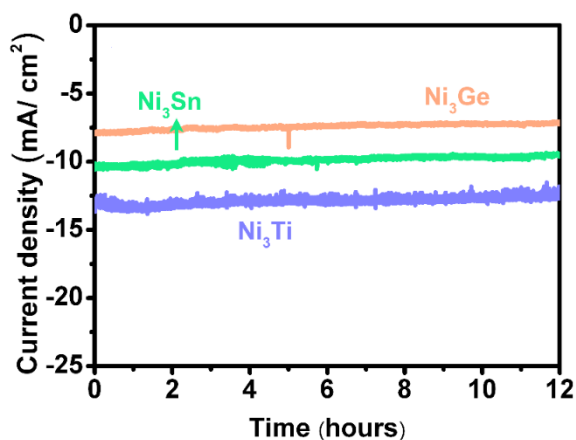

**Figure S8.** Chronoamperometry measurement of  $\text{Ni}_3M$  ( $M = \text{Ti}, \text{Sn}, \text{Ge}$ ) series over a period of 12 hours in 1.0 M KOH.

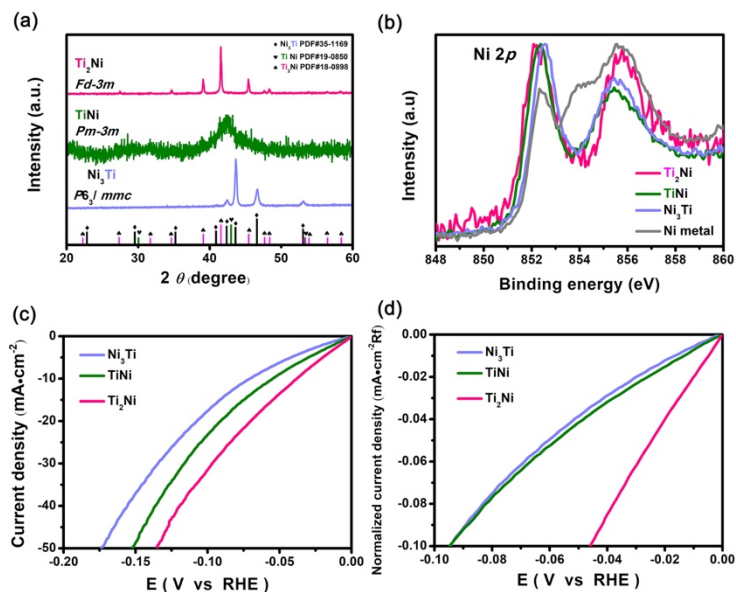

**Figure S9.** (a) Experimental powder X-ray diffraction (PXRD) patterns and (b) X-ray photoelectron spectrum (XPS) in the region of Ni 2p for  $\text{Ti}_2\text{Ni}$ ,  $\text{TiNi}$ , and  $\text{Ni}_3\text{Ti}$  (c) linear sweep voltammograms (LSV) and (d) normalized LSV based on roughness factor (RF) for  $\text{Ti}_2\text{Ni}$ ,  $\text{TiNi}$ , and  $\text{Ni}_3\text{Ti}$  at 1.0 M KOH (scan rate:  $5 \text{ mV s}^{-1}$ ).

**Table S1.** Refined lattice constants of  $\text{Ni}_3M$  ( $M = \text{Ti}, \text{Sn}, \text{Ge}$ ) series.

| formula                | lattice constants |           | averaged Ni–Ni bond distance ( $\text{\AA}$ ) |
|------------------------|-------------------|-----------|-----------------------------------------------|
|                        | $a$               | $c$       |                                               |
| $\text{Ni}_3\text{Ti}$ | 5.1017(1)         | 8.3076(1) | 2.543                                         |
| $\text{Ni}_3\text{Sn}$ | 5.288(1)          | 4.2416(1) | 2.568                                         |
| $\text{Ni}_3\text{Ge}$ | 3.5781(1)         | 3.5781(1) | 2.530                                         |

**Table S2.** Atomic ratio of  $\text{Ni}_3M$  ( $M = \text{Ti}, \text{Ge}$  and  $\text{Sn}$ ).

| Sample                 | Element | Atomic ratio (%) |
|------------------------|---------|------------------|
| $\text{Ni}_3\text{Ti}$ | Ni      | 71.33            |
|                        | Ti      | 28.67            |
| $\text{Ni}_3\text{Ge}$ | Ni      | 78.28            |
|                        | Ge      | 21.72            |
| $\text{Ni}_3\text{Sn}$ | Ni      | 73.45            |
|                        | Sn      | 26.55            |
